# Supplementary material
Source: HighWire-hosted journal article supplement (https://spcare.bmj.com/highwire/filestream/155157/field_highwire_adjunct_files/1/spcare-2023-004167supp002_data_supplement.pdf)
Supplement: spcare-2023-004167supp002_data_supplement.pdf [file spcare-2023-004167supp002_data_supplement.pdf]

For staff use  
Patient number:

|  |  |  |  |  |  |  |  |
|--|--|--|--|--|--|--|--|
|  |  |  |  |  |  |  |  |
|--|--|--|--|--|--|--|--|

## IPOS Patient Version

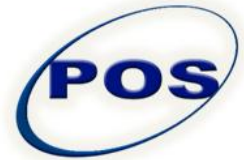

www.pos-pal.org

Name: .....

Date (dd/mm/yyyy):

|  |  |   |  |  |   |  |  |  |  |
|--|--|---|--|--|---|--|--|--|--|
|  |  | / |  |  | / |  |  |  |  |
|--|--|---|--|--|---|--|--|--|--|

**Please write clearly, one letter or digit per box. Your answers will help us to keep improving your care and the care of others.**

**Thank you.**

### Q1. What have been your main problems or concerns over the past 3 days?

1. \_\_\_\_\_
2. \_\_\_\_\_
3. \_\_\_\_\_

### Q2. Below is a list of symptoms, which you may or may not have experienced. For each symptom, please tick the box that best describes how it has affected you over the past 3 days.

|                                                | <i>Not at all</i>          | <i>Slightly</i>            | <i>Moderately</i>          | <i>Severely</i>            | <i>Overwhelmingly</i>      |
|------------------------------------------------|----------------------------|----------------------------|----------------------------|----------------------------|----------------------------|
| Pain                                           | 0 <input type="checkbox"/> | 1 <input type="checkbox"/> | 2 <input type="checkbox"/> | 3 <input type="checkbox"/> | 4 <input type="checkbox"/> |
| Shortness of breath                            | 0 <input type="checkbox"/> | 1 <input type="checkbox"/> | 2 <input type="checkbox"/> | 3 <input type="checkbox"/> | 4 <input type="checkbox"/> |
| Weakness or lack of energy                     | 0 <input type="checkbox"/> | 1 <input type="checkbox"/> | 2 <input type="checkbox"/> | 3 <input type="checkbox"/> | 4 <input type="checkbox"/> |
| Nausea (feeling like you are going to be sick) | 0 <input type="checkbox"/> | 1 <input type="checkbox"/> | 2 <input type="checkbox"/> | 3 <input type="checkbox"/> | 4 <input type="checkbox"/> |
| Vomiting (being sick)                          | 0 <input type="checkbox"/> | 1 <input type="checkbox"/> | 2 <input type="checkbox"/> | 3 <input type="checkbox"/> | 4 <input type="checkbox"/> |
| Poor appetite                                  | 0 <input type="checkbox"/> | 1 <input type="checkbox"/> | 2 <input type="checkbox"/> | 3 <input type="checkbox"/> | 4 <input type="checkbox"/> |
| Constipation                                   | 0 <input type="checkbox"/> | 1 <input type="checkbox"/> | 2 <input type="checkbox"/> | 3 <input type="checkbox"/> | 4 <input type="checkbox"/> |
| Sore or dry mouth                              | 0 <input type="checkbox"/> | 1 <input type="checkbox"/> | 2 <input type="checkbox"/> | 3 <input type="checkbox"/> | 4 <input type="checkbox"/> |
| Drowsiness                                     | 0 <input type="checkbox"/> | 1 <input type="checkbox"/> | 2 <input type="checkbox"/> | 3 <input type="checkbox"/> | 4 <input type="checkbox"/> |
| Poor mobility                                  | 0 <input type="checkbox"/> | 1 <input type="checkbox"/> | 2 <input type="checkbox"/> | 3 <input type="checkbox"/> | 4 <input type="checkbox"/> |

**Please list any other symptoms not mentioned above, and tick the box to show how they have affected you over the past 3 days.**

|    |                            |                            |                            |                            |                            |
|----|----------------------------|----------------------------|----------------------------|----------------------------|----------------------------|
| 1. | 0 <input type="checkbox"/> | 1 <input type="checkbox"/> | 2 <input type="checkbox"/> | 3 <input type="checkbox"/> | 4 <input type="checkbox"/> |
| 2. | 0 <input type="checkbox"/> | 1 <input type="checkbox"/> | 2 <input type="checkbox"/> | 3 <input type="checkbox"/> | 4 <input type="checkbox"/> |
| 3. | 0 <input type="checkbox"/> | 1 <input type="checkbox"/> | 2 <input type="checkbox"/> | 3 <input type="checkbox"/> | 4 <input type="checkbox"/> |

**Over the past 3 days:**

|                                                                                      | <i>Not at all</i>          | <i>Occasionally</i>        | <i>Sometimes</i>           | <i>Most of the time</i>    | <i>Always</i>              |
|--------------------------------------------------------------------------------------|----------------------------|----------------------------|----------------------------|----------------------------|----------------------------|
| <b>Q3. Have you been feeling anxious or worried about your illness or treatment?</b> | 0 <input type="checkbox"/> | 1 <input type="checkbox"/> | 2 <input type="checkbox"/> | 3 <input type="checkbox"/> | 4 <input type="checkbox"/> |
| <b>Q4. Have any of your family or friends been anxious or worried about you?</b>     | 0 <input type="checkbox"/> | 1 <input type="checkbox"/> | 2 <input type="checkbox"/> | 3 <input type="checkbox"/> | 4 <input type="checkbox"/> |
| <b>Q5. Have you been feeling depressed?</b>                                          | 0 <input type="checkbox"/> | 1 <input type="checkbox"/> | 2 <input type="checkbox"/> | 3 <input type="checkbox"/> | 4 <input type="checkbox"/> |

|                                                                                                               | <i>Always</i>              | <i>Most of the time</i>    | <i>Sometimes</i>           | <i>Occasionally</i>        | <i>Not at all</i>          |
|---------------------------------------------------------------------------------------------------------------|----------------------------|----------------------------|----------------------------|----------------------------|----------------------------|
| <b>Q6. Have you felt at peace?</b>                                                                            | 0 <input type="checkbox"/> | 1 <input type="checkbox"/> | 2 <input type="checkbox"/> | 3 <input type="checkbox"/> | 4 <input type="checkbox"/> |
| <b>Q7. Have you been able to share how you are feeling with your family or friends as much as you wanted?</b> | 0 <input type="checkbox"/> | 1 <input type="checkbox"/> | 2 <input type="checkbox"/> | 3 <input type="checkbox"/> | 4 <input type="checkbox"/> |
| <b>Q8. Have you had as much information as you wanted?</b>                                                    | 0 <input type="checkbox"/> | 1 <input type="checkbox"/> | 2 <input type="checkbox"/> | 3 <input type="checkbox"/> | 4 <input type="checkbox"/> |

|                                                                                                                    | <i>Problems addressed/<br/>No problems</i> | <i>Problems mostly addressed</i> | <i>Problems partly addressed</i> | <i>Problems hardly addressed</i> | <i>Problems not addressed</i> |
|--------------------------------------------------------------------------------------------------------------------|--------------------------------------------|----------------------------------|----------------------------------|----------------------------------|-------------------------------|
| <b>Q9. Have any practical problems resulting from your illness been addressed? (such as financial or personal)</b> | 0 <input type="checkbox"/>                 | 1 <input type="checkbox"/>       | 2 <input type="checkbox"/>       | 3 <input type="checkbox"/>       | 4 <input type="checkbox"/>    |

|                                                     | <i>On my own</i>         | <i>With help from a friend or relative</i> | <i>With help from a member of staff</i> |
|-----------------------------------------------------|--------------------------|--------------------------------------------|-----------------------------------------|
| <b>Q10 How did you complete this questionnaire?</b> | <input type="checkbox"/> | <input type="checkbox"/>                   | <input type="checkbox"/>                |

*If you are worried about any of the issues raised on this questionnaire then please speak to your doctor or nurse*
